# Supplementary material
Source: PubMed Central journal article supplement (PMC2275008)
Supplement: blood_blood-2007-10-121285_1.pdf [file blood_blood-2007-10-121285_1.pdf]

| <b>Autoimmune Disease</b>       | <b>Infectious Disorders</b> | <b>Inflammatory Disorders</b>   | <b>Total Allergies</b> |
|---------------------------------|-----------------------------|---------------------------------|------------------------|
| Autoantibodies detectable       | Cystitis                    | Atrophic gastritis              | Asthma                 |
| Addison disease                 | Gonorrhea                   | Chronic bronchitis              | Allergic rhinitis      |
| Amyotrophic lateral sclerosis   | Helminthiases               | Dacryadenitis                   | Dermatitis             |
| Autoimmune hemolytic anemia     | Herpes simplex              | Dermatitis                      | Urticaria              |
| Celiac disease                  | Herpes zoster               | Glomerulonephritis              | Erythema               |
| Chronic rheumatic heart disease | Infectious mononucleosis    | Iritis iridocyclitis            |                        |
| Discoid lupus erythematosus     | Influenza                   | Nephrotic syndrome              |                        |
| Graves disease                  | Intestinal infection        | Osteoarthritis                  |                        |
| Hashimoto thyroiditis           | Malaria                     | Pemphigus                       |                        |
| Immune thrombocytopenic purpura | Meningitis                  | Pericarditis, non-rheumatic     |                        |
| Myasthenia gravis               | Mycoses                     | Prostatitis                     |                        |
| Pernicious anemia               | Nasopharyngitis/laryngitis  | Valvular disease, non-rheumatic |                        |
| Polyarteritis nodosa            | Otitis media/mastoiditis    |                                 |                        |
| Polymyositis/dermatomyositis    | Pneumonia                   |                                 |                        |
| Primary biliary cirrhosis       | Poliomyelitis               |                                 |                        |
| Rheumatoid arthritis            | Pyelonephritis              |                                 |                        |
| Scleroderma (localized)         | Rickettsioses               |                                 |                        |
| Sjögren syndrome                | Septicemia                  |                                 |                        |
| Systemic lupus erythematosus    | Sinusitis                   |                                 |                        |
| Systemic sclerosis              | Spirochetes                 |                                 |                        |
| Autoantibodies not detectable   | Syphilis                    |                                 |                        |
| Ankylosing spondylitis          | Tuberculosis                |                                 |                        |
| Crohn disease                   | Viral Hepatitis             |                                 |                        |
| Hemorrhagic proctitis           | Zoonoses                    |                                 |                        |
| Polymyalgia rheumatica          |                             |                                 |                        |
| Psoriasis                       |                             |                                 |                        |
| Reiter disease                  |                             |                                 |                        |
| Rheumatic fever                 |                             |                                 |                        |
| Sarcoidosis                     |                             |                                 |                        |
| Ulcerative colitis              |                             |                                 |                        |
